# Supplementary material
Source: HighWire-hosted journal article supplement (https://heart.bmj.com/content/109/17/1281)
Supplement: inline-supplementary-material-1 [file inline-supplementary-material-1.pdf]

## **Supplemental Appendix**

### **Supplemental Table 1: Chylopericardium cases with notable characteristics**

### **Supplemental References**

**Supplemental Table 1: Chylopericardium cases with notable characteristics**

| Author                           | Year | Age | Gender | Symptomatic | Tamponade | Recurrent<br>CPE | Death |
|----------------------------------|------|-----|--------|-------------|-----------|------------------|-------|
| Chaloob et al <sup>1</sup>       | 2008 | 50  | M      | 1           | 1         | 0                | 0     |
| Wang et al <sup>2</sup>          | 2000 | 61  | M      | 1           | 0         | 0                | 0     |
| Mundra et al <sup>3</sup>        | 2011 | 54  | M      | 1           | 1         | 0                | 0     |
| Lee et al <sup>4</sup>           | 2017 | 26  | F      | 1           | 1         | 0                | 0     |
| Rafiq et al <sup>5</sup>         | 2016 | 32  | F      | 1           | 1         | 0                | 0     |
| Sasaki et al <sup>6</sup>        | 2002 | 49  | M      | 0           | 0         | 0                | 0     |
| Raza et al <sup>7</sup>          | 2009 | 39  | F      | 1           | 1         | 1                | 0     |
| Raya et al <sup>8</sup>          | 2017 | 28  | F      | 1           | 1         | 0                | 0     |
| Sakata et al <sup>9</sup>        | 2000 | 20  | M      | 0           | 0         | 0                | 0     |
| Raza et al <sup>7</sup>          | 2009 | 33  | F      | 1           | 1         | 1                | 0     |
| Mistui et al <sup>10</sup>       | 2005 | 27  | F      | 1           | 0         | 0                | 0     |
| Cheng et al <sup>11</sup>        | 2013 | 59  | M      | 1           | 1         | 0                | 0     |
| Cheng et al <sup>11</sup>        | 2013 | 45  | F      | 1           | 0         | 0                | 0     |
| O'Donnell et<br>al <sup>12</sup> | 2019 | 39  | M      | 1           | 1         | 1                | 0     |
| Knight et al <sup>13</sup>       | 1965 | 62  | M      | 1           | 1         | 0                | 0     |
| Malhotra et al <sup>14</sup>     | 2018 | 21  | F      | 1           | 1         | 0                | 0     |
| Bar-El et al <sup>15</sup>       | 1989 | 39  | F      | 1           | 1         | 1                | 0     |
| Mood et al <sup>16</sup>         | 2006 | 34  | M      | 0           | 1         | 0                | 0     |
| Adekile et al <sup>17</sup>      | 2009 | 34  | M      | 1           | 1         | 0                | 0     |
| Morishita et al <sup>18</sup>    | 1985 | 25  | M      | 0           | 0         | 0                | 0     |
| de Winter et<br>al <sup>19</sup> | 1994 | 40  | F      | 0           | 0         | 1                | 0     |

|                                |      |    |   |   |   |   |   |
|--------------------------------|------|----|---|---|---|---|---|
| Yildirim et al <sup>20</sup>   | 2009 | 24 | F | 1 | 0 | 0 | 0 |
| Kannagi et al <sup>21</sup>    | 1982 | 23 | M | 1 | 0 | 0 | 0 |
| Morris et al <sup>22</sup>     | 2019 | 68 | F | 1 | 0 | 1 | 0 |
| Lee et al <sup>23</sup>        | 1987 | 49 | M | 1 | 1 | 0 | 0 |
| Kamata et al <sup>24</sup>     | 2017 | 54 | M | 1 | 1 | 0 | 0 |
| Kalimuthu et al <sup>25</sup>  | 2020 | 47 | M | 0 | 0 | 1 | 0 |
| Barton et al <sup>26</sup>     | 1980 | 48 | M | 1 | 0 | 0 | 0 |
| Rankin et al <sup>27</sup>     | 1980 | 19 | F | 0 | 0 | 0 | 0 |
| Barbetakis et al <sup>28</sup> | 2010 | 41 | F | 1 | 1 | 0 | 0 |
| Chavez et al <sup>29</sup>     | 1973 | 27 | M | 0 | 0 | 0 | 0 |
| Karaca et al <sup>30</sup>     | 2014 | 47 | M | 1 | 0 | 0 | 0 |
| Charnilas et al <sup>31</sup>  | 1977 | 18 | F | 0 | 0 | 0 | 0 |
| Wilmshurst et al <sup>32</sup> | 1986 | 21 | F | 0 | 0 | 1 | 0 |
| Weyne et al <sup>33</sup>      | 1987 | 25 | M | 1 | 0 | 0 | 0 |
| Luo et al <sup>34</sup>        | 2018 | 33 | F | 0 | 0 | 0 | 0 |
| Nanjo et al <sup>35</sup>      | 2004 | 47 | M | 1 | 0 | 0 | 0 |
| Nanjo et al <sup>35</sup>      | 2004 | 21 | F | 1 | 0 | 1 | 0 |
| Niznansky et al <sup>36</sup>  | 2015 | 48 | F | 1 | 1 | 0 | 0 |

|                                |      |    |   |   |   |   |   |
|--------------------------------|------|----|---|---|---|---|---|
| Yokusoglu et al <sup>37</sup>  | 2005 | 36 | M | 0 | 0 | 0 | 0 |
| Gallant et al <sup>38</sup>    | 1977 | 19 | F | 0 | 0 | 0 | 0 |
| Holder et al <sup>39</sup>     | 2020 | 26 | F | 1 | 0 | 0 | 0 |
| Sehgal et al <sup>40</sup>     | 2017 | 46 | F | 1 | 1 | 0 | 1 |
| Svedjeholm et al <sup>41</sup> | 1997 | 51 | F | 1 | 0 | 0 | 0 |
| Swelstad et al <sup>42</sup>   | 2003 | 31 | F | 1 | 1 | 0 | 0 |
| Szabados et al <sup>43</sup>   | 2011 | 46 | F | 1 | 0 | 0 | 0 |
| Yu et al <sup>44</sup>         | 2018 | 57 | M | 1 | 0 | 1 | 0 |
| Van Elden et al <sup>45</sup>  | 2014 | 42 | M | 1 | 0 | 0 | 0 |
| Coplu et al <sup>46</sup>      | 1992 | 25 | M | 1 | 0 | 0 | 0 |
| Goldstein et al <sup>47</sup>  | 1969 | 21 | F | 0 | 0 | 1 | 0 |
| Silva et al <sup>48</sup>      | 2009 | 20 | F | 1 | 0 | 1 | 0 |
| Tuncay et al <sup>49</sup>     | 2016 | 22 | F | 1 | 0 | 0 | 0 |
| Obeidat et al <sup>50</sup>    | 2020 | 28 | F | 1 | 1 | 0 | 0 |
| Chia et al <sup>51</sup>       | 2020 | 67 | M | 1 | 1 | 0 | 0 |
| Hattori et al <sup>52</sup>    | 2011 | 30 | F | 1 | 0 | 0 | 0 |
| Feldman et al <sup>53</sup>    | 2001 | 40 | M | 1 | 1 | 0 | 0 |
| Ozturk et al <sup>54</sup>     | 2017 | 56 | F | 1 | 1 | 1 | 1 |
| Mogulkoc et al <sup>55</sup>   | 1999 | 19 | F | 1 | 0 | 0 | 1 |

|                                        |      |    |   |   |   |   |   |
|----------------------------------------|------|----|---|---|---|---|---|
| Miyoshi et al <sup>56</sup>            | 2008 | 58 | F | 1 | 0 | 0 | 0 |
| Ross et al <sup>57</sup>               | 1979 | 19 | M | 0 | 0 | 0 | 0 |
| Fawal et al <sup>58</sup>              | 1967 | 36 | M | 1 | 0 | 0 | 0 |
| Arendt et al <sup>59</sup>             | 1996 | 47 | F | 1 | 0 | 0 | 0 |
| Yang et al <sup>60</sup>               | 2017 | 52 | M | 0 | 0 | 0 | 0 |
| Koutsogiannidis<br>et al <sup>61</sup> | 2013 | 36 | F | 0 | 0 | 0 | 0 |
| Lippman et al <sup>62</sup>            | 2016 | 50 | M | 1 | 1 | 0 | 0 |
| Lara et al <sup>63</sup>               | 2019 | 42 | M | 1 | 0 | 0 | 0 |
| Lee et al <sup>64</sup>                | 2006 | 25 | M | 1 | 1 | 0 | 1 |
| Bewick et al <sup>65</sup>             | 1984 | 42 | F | 1 | 0 | 0 | 0 |
| Girard et al <sup>66</sup>             | 2019 | 33 | F | 1 | 1 | 0 | 0 |
| Bhat et al <sup>67</sup>               | 2011 | 19 | M | 1 | 1 | 0 | 0 |
| Chew et al <sup>68</sup>               | 2014 | 66 | M | 1 | 0 | 1 | 0 |
| Borulu et al <sup>69</sup>             | 2020 | 62 | M | 1 | 0 | 0 | 0 |
| Akamatsu et<br>al <sup>70</sup>        | 1994 | 24 | M | 0 | 0 | 0 | 0 |
| Revere et al <sup>71</sup>             | 2007 | 18 | F | 1 | 1 | 0 | 0 |
| Mehrotra et al <sup>72</sup>           | 2006 | 22 | M | 1 | 1 | 0 | 0 |
| Mandarry et al <sup>73</sup>           | 2012 | 19 | M | 1 | 1 | 0 | 0 |
| Stewart et al <sup>74</sup>            | 2009 | 45 | M | 0 | 1 | 0 | 0 |
| Rosa et al <sup>75</sup>               | 2014 | 58 |   | 1 | 1 | 0 | 0 |

|                                              |      |    |   |   |   |   |   |
|----------------------------------------------|------|----|---|---|---|---|---|
| Selimoglu et al <sup>76</sup>                | 2008 | 67 | M | 1 | 0 | 0 | 0 |
| Gilmore et al <sup>77</sup>                  | 2012 | 48 | F | 1 | 0 | 0 | 0 |
| Kashyap et al <sup>78</sup>                  | 2011 | 21 | F | 1 | 0 | 0 | 0 |
| Sanso et al <sup>79</sup>                    | 2016 | 31 | M | 1 | 1 | 0 | 1 |
| Gupta et al <sup>80</sup>                    | 2017 | 49 | F | 1 | 1 | 0 | 0 |
| de Santis et al <sup>81</sup>                | 2020 | 56 | M | 1 | 0 | 0 | 0 |
| Mi et al <sup>82</sup>                       | 2020 | 51 | M | 1 | 0 | 0 | 0 |
| Lieberman et al <sup>83</sup>                | 2006 | 45 | M | 1 | 0 | 0 | 0 |
| Katabi et al <sup>84</sup>                   | 2020 | 24 | M | 0 | 1 | 0 | 0 |
| Savran et al <sup>85</sup>                   | 1975 | 29 | M | 0 | 0 | 0 | 0 |
| Vinaykumar et al <sup>86</sup>               | 2014 | 18 | M | 0 | 0 | 0 | 0 |
| Melduni et al <sup>87</sup>                  | 2008 | 74 | M | 1 | 0 | 0 | 0 |
| Matsuyama et al <sup>88</sup>                | 2003 | 20 | M | 0 | 0 | 0 | 0 |
| Jenner et al <sup>89</sup>                   | 1975 | 30 | F | 1 | 0 | 0 | 0 |
| Kawthar et al <sup>90</sup>                  | 2020 | 33 | F | 0 | 0 | 0 | 0 |
| Mahon et al <sup>91</sup>                    | 2003 | 25 | M | 0 | 0 | 1 | 0 |
| Koksel et al <sup>92</sup>                   | 2007 | 25 | M | 1 | 0 | 0 | 0 |
| Barillas et al <sup>93</sup>                 | 2021 | 26 | M | 1 | 0 | 0 | 1 |
| Reddy et al <sup>94</sup><br>x <sup>95</sup> | 2021 | 27 | F | 1 | 0 | 0 | 0 |

*CPE: Chylopericardium*



**Supplemental References:**

1. Chalooob S, Brown M, Stuklis RG. Chylous Pericardial Effusion after Aortic Valve Replacement. *Asian Cardiovasc Thorac Ann* 2008;16:e21–e22.
2. Wang CH, Yen TC, Ng KK, Lee CM, Hung MJ, Cherng WJ. Pedal 99mTc-sulfur colloid lymphoscintigraphy in primary isolated chylopericardium. *Chest* 2000;117:598–601. Available at: <https://pubmed.ncbi.nlm.nih.gov/10669713/>. Accessed May 5, 2021.
3. Mundra V, Savage EB, Novaro GM, Asher CR. Delayed chylous pericardial effusion after aortic valve replacement. *Texas Hear Inst J* 2011;38:431–432. Available at: </pmc/articles/PMC3147199/>. Accessed May 5, 2021.
4. Lee JC, Chen T, Branch K. B-Cell Lymphoma Associated Pericardial Tamponade With Conversion To Chylous Effusion During Pregnancy. *J Am Coll Cardiol* 2017;69:2159.
5. Rafiq MU, Ali J, Saad H, Wilson S, Tornout F Van. Management of idiopathic chylopericardium in Pregnant Patient. *Asian Cardiovasc Thorac Ann* 2016;24:798–800. Available at: <https://pubmed.ncbi.nlm.nih.gov/27357118/>. Accessed May 5, 2021.
6. Sasaki A, Watanabe Y, Tokunaga C. Chylopericardium Following Mitral Valve Replacement. In: Vol 50. Japanese Association for Thoracic Surgery; 2002:518–519. Available at: <https://pubmed.ncbi.nlm.nih.gov/12561093/>. Accessed May 3, 2021.
7. Raza M, Matar K. Idiopathic Chylothorax and Chylopericardium Resistant to Conservative and Surgical Management. *Hear Lung Circ* 2009;18:229–232. Available at: <https://pubmed.ncbi.nlm.nih.gov/18296116/>. Accessed May 5, 2021.
8. Raya N, Kramer JB, Tandon R. Chylopericardium with chylothorax: First recorded case from obstructive hodgkin's lymphoma. *Am J Respir Crit Care Med* 2017;195. Available at: [www.atsjournals.org](http://www.atsjournals.org). Accessed May 5, 2021.

9. Sakata S, Yoshida I, Otani Y, Ishikawa S, Morishita Y. Thoracoscopic treatment of primary chylopericardium. *Ann Thorac Surg* 2000;69:1581–1582. Available at: <https://pubmed.ncbi.nlm.nih.gov/10881850/>. Accessed May 5, 2021.
10. Mitsui K, Namiki K, Matsumoto H, Konno F, Yoshida R, Miura S. Thoracoscopic treatment for primary chylopericardium: Report of a case. *Surg Today* 2005;35:76–79. Available at: <https://pubmed.ncbi.nlm.nih.gov/15622469/>. Accessed May 5, 2021.
11. Cheng CS, Uchime C, Kang D. Two cases of chylopericardium after aortic valve surgery. *Asian Cardiovasc Thorac Ann* 2013;21:588–591. Available at: <https://pubmed.ncbi.nlm.nih.gov/24570562/>. Accessed May 5, 2021.
12. O'Donnell J, Kirkham J, Monteith D, Frontario C, Sharma R, Higgins B. Chylous Cardiac Tamponade with Chylothoraces Secondary to Hodgkin's Lymphoma: Octreotide in Conjunction with Standard of Care Dietary Fat Restriction. *Case Reports Crit Care* 2019;2019:1–4. Available at: <https://pubmed.ncbi.nlm.nih.gov/31019812/>. Accessed May 5, 2021.
13. Knight H. Primary chylopericardium. *J Thorac. Cardiovasc. Surg* 1965;5:567–580.
14. Malhotra G, Chick JFB, Srinivasa RN, Hussain JS, Gemmete JJ, Srinivasa RN. Mediastinal Lymphangioma Complicated by Chylopericardium, Tamponade, and Cardiac Arrest Treated with an Endolymphatic Stent Graft. *J Vasc Interv Radiol* 2018;29:1438–1439. Available at: <https://pubmed.ncbi.nlm.nih.gov/30266225/>. Accessed May 5, 2021.
15. Bar-El Y, Smolinsky A, Yellin A. Chylopericardium as a complication of mitral valve replacement. *Thorax* 1989;44:74–75. Available at: <https://pubmed.ncbi.nlm.nih.gov/2928992/>. Accessed May 5, 2021.
16. Mood G, Shaaraoui M, Allareddy R, Smith D, Rodriguez L, Hammer D, Kalahasti V. Chylous Pericardial Effusion After Minimally Invasive Mitral Valve Repair. *Ann Thorac Surg*

2006;82:1892–1894. Available at: <https://pubmed.ncbi.nlm.nih.gov/17062270/>. Accessed May 5, 2021.

17. Adekile A, Adegroye A, Tedla F, Levin D, Salifu MO. Chylothorax and chylopericardial tamponade in a hemodialysis patient with catheter-induced superior vena cava stenosis. *Semin Dial* 2009;22:576–579. Available at: <https://pubmed.ncbi.nlm.nih.gov/19747178/>. Accessed May 5, 2021.

18. Morishita Y, Taira A, Furoi A, Arima S, Tanaka H. Constrictive pericarditis secondary to primary chylopericardium. *Am Heart J* 1985;109:373–375. Available at: <https://pubmed.ncbi.nlm.nih.gov/3966359/>. Accessed May 5, 2021.

19. Winter RJ de, Bresser P, Römer JWP, Kromhout JG, Reekers J. Idiopathic chylopericardium with bilateral pulmonary reflux of chyle. *Am Heart J* 1994;127:936–939. Available at: <https://pubmed.ncbi.nlm.nih.gov/8154437/>. Accessed May 5, 2021.

20. Yildirim T, Selimoglu O, Cevik C, Ozturk I, Oz FM, Kurtoglu N, Ogus NT. Chylopericardium following double valve replacement. *Turkish J Thorac Cardiovasc Surg* 2009;17:296–298.

21. Kannagi T, Osakada G, Wakabayashi A, Kawai C, Matsuda M, Miki S. Primary chylopericardium. *Chest* 1982;81:105–108. Available at: <http://journal.chestnet.org/article/S0012369216485296/fulltext>. Accessed May 5, 2021.

22. Morris AL, Colbourne T, Kirkpatrick I, Banerji V. Complete resolution of chylopericardium after chemotherapy for chronic lymphocytic leukemia. *Curr Oncol* 2019;26:e696–e699. Available at: <https://pubmed.ncbi.nlm.nih.gov/31708663/>. Accessed May 5, 2021.

23. Lee Y, Lee WK, Doromal N, Ganepola GA, Hutchinson J. Cardiac tamponade resulting from massive chylopericardium after an aorta-coronary bypass operation. *J Thorac Cardiovasc Surg*

- 1987;94:449–450. Available at: [http://dx.doi.org/10.1016/S0022-5223\(19\)36264-6](http://dx.doi.org/10.1016/S0022-5223(19)36264-6).
24. Kamata T, Shiba M, Fujiwara T, Nagato K, Yoshida S, Inoue T, Iida T. Chylopericardium following thoracoscopic resection of a mediastinal cyst: A case report. *Int J Surg Case Rep* 2017;39:126–130. Available at: <https://pubmed.ncbi.nlm.nih.gov/28837916/>. Accessed May 5, 2021.
25. Kalimuthu LM, Saini VK, Pradhan PK. Lymphoscintigraphy in a case of recurrent chylopericardium. *Asia Ocean J Nucl Med Biol* 2020;8:157–159. Available at: </pmc/articles/PMC7354237/>. Accessed May 5, 2021.
26. Barton JC, Durant JR. Isolated chylopericardium associated with lymphoma. *South Med J* 1980;73:1551–1552. Available at: <https://pubmed.ncbi.nlm.nih.gov/6893761/>. Accessed May 5, 2021.
27. Rankin R, Raval B, Finley R. Primary chylopericardium: Combined lymphangiographic and CT diagnosis. *J Comput Assist Tomogr* 1980;4:869–870.
28. Barbetakis N, Asteriou C, Konstantinou D, Giannoglou D, Tsilikas C, Giannoglou G. Spontaneous chyloous cardiac tamponade: A case report. *J Cardiothorac Surg* 2010;5. Available at: <https://pubmed.ncbi.nlm.nih.gov/20236535/>. Accessed May 5, 2021.
29. Chavez CM, Rodriquez GR, Conn JH. Isolated chylopericardium. Lymphographic findings and surgical treatment. *Am J Cardiol* 1973;32:352–355. Available at: <https://pubmed.ncbi.nlm.nih.gov/4725590/>. Accessed May 5, 2021.
30. Karaca S, Rager O, Kalangos A. Successful treatment of persistent chylopericardium with somatostatin after operation on ascending aorta. *Ann Thorac Surg* 2014;97. Available at: <https://pubmed.ncbi.nlm.nih.gov/24694457/>. Accessed May 5, 2021.
31. Charnilas Y, Levo Y, Weiss A. Isolated idiopathic chylopericardium. *J Thorac Cardiovasc*

*Surg* 1977;73:719–721.

32. Wilmshurst PT, Burnie JP, Turner PR, Kubie A. Chylopericardium, chylothorax, and hypobetalipoproteinaemia. *Br Med J (Clin Res Ed)* 1986;293:483–484. Available at: <https://www.ncbi.nlm.nih.gov/pmc/articles/PMC1341116/>. Accessed May 3, 2021.

33. Weyne A, Lampaert A, Clement D. Chyle: a masquerading etiology of pericardial effusion. *Int J Cardiol* 1987;14:106–109. Available at: <https://pubmed.ncbi.nlm.nih.gov/3804500/>. Accessed May 5, 2021.

34. Luo X, Zhang Z, Wang SQ, Gu XD, Wang X. Chyloptysis with chylopericardium, a rare case and mini-review. *BMC Pulm Med* 2018;18:1–5. Available at: <https://bmcpulmed.biomedcentral.com/articles/10.1186/s12890-018-0583-y>. Accessed May 5, 2021.

35. Nanjo S, Yamazaki J, Tsubuku M, Ohyama T, Ohtsuka T, Nakano H. Primary idiopathic chylopericardium: Report of two cases. *Ann Nucl Med* 2004;18:537–539. Available at: <https://pubmed.ncbi.nlm.nih.gov/15515756/>. Accessed May 5, 2021.

36. Niznansky M, Prskavec T, Cerny V, Lindner J. Chylous pericardial effusion as a rare complication after pulmonary endarterectomy. *Interact Cardiovasc Thorac Surg* 2015;21:257–259. Available at: <https://academic.oup.com/icvts/article/21/2/257/767316>. Accessed May 5, 2021.

37. Yokusoglu M, Savasoz BS, Baysan O, Erinc K, Gunay C, Isik E. Primary chylopericardium. *Thorac Cardiovasc Surg* 2005;53:386–388. Available at: <https://pubmed.ncbi.nlm.nih.gov/16311980/>. Accessed May 5, 2021.

38. Gallant TE, Hunziker RJ, Gibson TC. Primary chylopericardium: the role of lymphangiography. *Am J Roentgenol* 1977;129:1043–1045. Available at:

- <https://pubmed.ncbi.nlm.nih.gov/413356/>. Accessed May 5, 2021.
39. Holder T, Patel D, Salloum J, Agrawal V. A Rare Cause Of A Non-Remitting Pericardial Effusion In A Patient With Lupus. *J Am Coll Cardiol* 2020;75:3127.
40. Sehgal R, Schriver E, Tsapenko A, Turner J. Superior Vena Cava Syndrome, Chylothorax, and Chylopericardium: A Rarely Reported Finding in Non-Small Cell Lung Cancer. *Chest* 2017;152:A655. Available at: <http://dx.doi.org/10.1016/j.chest.2017.08.685>. Accessed May 5, 2021.
41. Svedjeholm R, Jansson K, Olin C. Primary idiopathic chylopericardium - A case report and review of the literature. *Eur J Cardio-thoracic Surg* 1997;11:387–390. Available at: <https://pubmed.ncbi.nlm.nih.gov/9080174/>. Accessed May 5, 2021.
42. Swelstad MR, Frumiento C, Garry-McCoy A, Agni R, Weigel TL. Chylotamponade: An unusual presentation of Gorham’s Syndrome. *Ann Thorac Surg* 2003;75:1650–1652. Available at: <https://pubmed.ncbi.nlm.nih.gov/12735603/>. Accessed May 5, 2021.
43. Szabados E, Toth K, Mezosi E. Use of octreotide in the treatment of chylopericardium. *Heart Lung J Acute Crit Care* 2011;40:574–575. Available at: <https://pubmed.ncbi.nlm.nih.gov/20561867/>. Accessed May 5, 2021.
44. Yu X, Jia N, Ye S, Zhou M, Liu D. Primary chylopericardium: A case report and literature review. *Exp Ther Med* 2018;15:419–425. Available at: [/pmc/articles/PMC5763741/](https://pubmed.ncbi.nlm.nih.gov/31111111/). Accessed May 5, 2021.
45. Elden LJR Van, Elema G, Brijker F, Teding Van Berkhout F, Weits T. Chylothorax and chylopericardium: A rare clinical presentation of gorham’s disease. *Am J Respir Crit Care Med* 2014;189. Available at: [www.atsjournals.org](http://www.atsjournals.org). Accessed May 5, 2021.
46. Coplu L, Emri S, Selcuk ZT, Kalyoncu F, Balkanci F, Sahin AA, Baris YI. Life threatening

- chyloous pleural and pericardial effusion in a patient with Behcet's syndrome. *Thorax* 1992;47:64–65. Available at: <https://pubmed.ncbi.nlm.nih.gov/1539151/>. Accessed May 5, 2021.
47. Goldstein MR, Benchimol A, Cornell W, Long DR. Chylopericardium with Multiple Lymphangioma of Bone. *N Engl J Med* 1969;280:1034–1037. Available at: <https://pubmed.ncbi.nlm.nih.gov/4238089/>. Accessed May 5, 2021.
48. Silva MADM, Martins AS, Leite De Campos NLK, Andrade RR De, Tohi LM, Hueb JC. Primary idiopathic chylopericardium - Case report. *Arq Bras Cardiol* 2009;92:e67–e69.
49. Tuncay A, Akcalı Y, Serhatlıoğlu F, Özmen R, Gazioğlu Ö. Pericardioperitoneal Fenestration for Chylopericardium. *Erciyes Med J* 2016;38:84–91. Available at: [www.erciyesmedj.com](http://www.erciyesmedj.com). Accessed May 5, 2021.
50. Obeidat O, Baniissa B, Shkoukani Z, Alhourri A. Mediastinal lymphoma-induced superior vena cava syndrome and chylopericardium in a pregnant lady: A case report. *Avicenna J Med* 2020;10:89. Available at: </pmc/articles/PMC7252616/>. Accessed May 5, 2021.
51. Chia AXF, Pang PYK. Isolated Chylopericardium: An Unusual Cause of Late Cardiac Tamponade After Mitral Valve Repair. *Ann Thorac Surg* 2020;110:e497–e500. Available at: <https://pubmed.ncbi.nlm.nih.gov/32454020/>. Accessed May 5, 2021.
52. Hattori H, Dakeshita E, Nakazato J, Takahashi T, Wake M, Hirata K, Yasumoto H, Tengan T, Mototake H. Primary chylopericardium treated by surgery: Report of two cases. *J Cardiol Cases* 2011;3. Available at: <https://pubmed.ncbi.nlm.nih.gov/30532850/>. Accessed May 5, 2021.
53. Feldman L, Kleiner-Baumgarten A, Maislos M. Large pericardial and pleural effusions associated with familial lymphedema. *Isr Med Assoc J* 2001;3:769–770. Available at: <https://www.ima.org.il/FilesUploadPublic/IMAJ/0/60/30341.pdf>. Accessed May 5, 2021.
54. Öztürk S, Durmuş G, Ağuş HZ, Koç HA, Can MM. A rare cause of pericardial tamponade:

- Chylopericardium. *Anatol J Cardiol* 2017;18:E-11-E-12. Available at: <https://pubmed.ncbi.nlm.nih.gov/29256889/>. Accessed May 5, 2021.
55. Mogulkoc N, Önal B, Okyay N, Günel Ö, Bayindir Ü. Chylothorax, chylopericardium and lymphoedema - The presenting features of signet-ring cell carcinoma. *Eur Respir J* 1999;13:1489–1491.
56. Miyoshi K, Nakagawa T, Kokado Y, Matsuoka T, Kameyama K, Okumura N. Primary chylopericardium with pulmonary lymphedema. *Thorac Cardiovasc Surg* 2008;56:306–308. Available at: <https://pubmed.ncbi.nlm.nih.gov/18615382/>. Accessed May 5, 2021.
57. Ross P, Joseph S, Walker D. A case of isolated primary chylopericardium. *Br Heart J* 1979;41:508–511. Available at: <https://pubmed.ncbi.nlm.nih.gov/1013444/>. Accessed May 5, 2021.
58. Fawal IA, Kirkland L, Dykes R, Foster GL. Chronic Primary Chylopericardium Report of a Case and Review of the Literature. *Circulation* 1967;35:777–782. Available at: [http://ahajournals.org](https://ahajournals.org/). Accessed May 5, 2021.
59. Arendt T, Bastian A, Lins M, Klause N, Schmidt WE, Fölsch UR. Chylous cardiac tamponade in acute pancreatitis. *Dig Dis Sci* 1996;41:1972–1974. Available at: <https://pubmed.ncbi.nlm.nih.gov/8888709/>. Accessed May 5, 2021.
60. Yang W, Luo C, Liu Z, Cheng C. Chylous pericardial effusion after pulmonary lobectomy. *Interact Cardiovasc Thorac Surg* 2017;25:145–146. Available at: <https://pubmed.ncbi.nlm.nih.gov/28329055/>. Accessed May 5, 2021.
61. Koutsogiannidis CP, Ananiadou O, Kapsas G, Madesis A, Palladas P, Drossos G. “Early” Post-Cardiotomy Chylopericardium and the Imaging Value of Magnetic Resonance Thoracic-Ductography. *Hear Lung Circ* 2013;22:1033–1035. Available at: <https://pubmed.ncbi.nlm.nih.gov/23811111/>. Accessed May 5, 2021.



<https://pubmed.ncbi.nlm.nih.gov/24314895/>. Accessed May 5, 2021.

62. Lippmann M, Gupta K. Chylous pericardial effusion resulting in cardiac tamponade. *Indian Heart J* 2016;68:S161–S162. Available at: <https://pubmed.ncbi.nlm.nih.gov/27751275/>. Accessed May 5, 2021.

63. Lara K, Reber J, DuBrock H, Araoz P, Lin G. Chylopericardium Secondary To Thoracic Duct Obstruction In A Patient With Plastic Bronchitis. *J Am Coll Cardiol* 2019;73:2264.

64. Lee N, Coco M. Chylous pericardial tamponade in a haemodialysis patient with catheter-associated thrombosis of internal jugular and subclavian veins. *Nephrol Dial Transplant* 2006;21:2650–2653. Available at: <https://academic.oup.com/ndt/article/21/9/2650/1938786>. Accessed May 5, 2021.

65. Bewick DJ, Johnstone DE, Landrigan PL. Primary chylopericardium associated with allergic alveolitis. *Can Med Assoc J* 1984;130:1577–1579. Available at: </pmc/articles/PMC1483364/?report=abstract>. Accessed May 5, 2021.

66. Girard M, Phelps B, Paczkowski S, Gomez D, Morizio A. Chylopericardium Causing Cardiac Tamponade In A Young Pregnant Woman. *Chest* 2019;156:A80. Available at: <http://journal.chestnet.org/article/S001236921931671X/fulltext>. Accessed May 5, 2021.

67. Bhat P, Ananthakrishna R, Panneerselvam A, Yalagudri SD, Rao PSM, Nanjappa MC. Recurrent chylopericardium. *BMJ Case Rep* 2011;2011:bcr0720114520. Available at: <http://casereports.bmj.com/>. Accessed May 5, 2021.

68. Chew H, Shetty P, Elahi M, Akhunji Z. A case of spontaneous chylous pericardial effusion in Poland syndrome. *Gen Thorac Cardiovasc Surg* 2014;62:386–389. Available at: <https://pubmed.ncbi.nlm.nih.gov/23918317/>. Accessed May 5, 2021.

69. Borulu F, Erkut B. Successful conservative treatment of chylopericardium after open-heart

- surgery: A case report. *J Tehran Univ Hear Cent* 2020;15:73–76. Available at: <https://pubmed.ncbi.nlm.nih.gov/33552198/>. Accessed May 5, 2021.
70. Akamatsu H, Amano J, Sakamoto T, Suzuki A. Primary chylopericardium. *Ann Thorac Surg* 1994;58:262–266.
71. Revere DJ, Makaryus AN, Bonaros EP, Graver LM. Chylopericardium presenting as cardiac tamponade: Secondary to an anterior mediastinal cystic teratoma. *Texas Hear Inst J* 2007;34:379–382. Available at: </pmc/articles/PMC1995052/>. Accessed May 5, 2021.
72. Mehrotra S, Peeran NA, Bandyopadhyay A. Idiopathic chylopericardium: An unusual cause of cardiac tamponade. *Texas Hear Inst J* 2006;33:249–252. Available at: </pmc/articles/PMC1524687/>. Accessed May 5, 2021.
73. Mandarray MT, Ru XH, Wei ZQ, Ge MJ. Primary idiopathic chylopericardium: a rare case with a synopsis of the literature. *Singapore Med J* 2012. Available at: <https://www.sma.org.sg/UploadedImg/files/SMJ/5307/5307cr8.pdf>. Accessed May 5, 2021.
74. Stewart D, Chico T, Ackroyd R. Chylopericardial tamponade complicating oesophago-gastrectomy. *Interact Cardiovasc Thorac Surg* 2009;8:176–177. Available at: [www.icvts.org](http://www.icvts.org). Accessed May 5, 2021.
75. Rosa GM, Campisi C, Boccardo F, Dorigi U, Parodi A, Molinari L, Spinaci S, Dessalvi S, Brunelli C, Campisi CC. Chylopericardium: A Case Report Demonstrating Utility Of Lymphography Combined With 3d Computed Tomography For Corrective Surgical Treatment Using Vats. *Lymphology* 2014;47:40-43. Available at: <https://journals.uair.arizona.edu/index.php/lymph/article/view/18217>. Accessed May 5, 2021.
76. Selimoglu O, Basaran M, Ugurlucan M, Temucin Dgus N. An interesting cause of chylopericardium after open heart surgery: A lymphatic channel. *J Card Surg* 2008;23:261–263.

Available at: <https://pubmed.ncbi.nlm.nih.gov/18435647/>. Accessed May 5, 2021.

77. Gilmore D, Colson Y. Recurrent chylous pericardial effusion and left neck mass. *Thorac Cardiovasc Surg Suppl* 2012;60. Available at: <https://pubmed.ncbi.nlm.nih.gov/23165758/>. Accessed May 5, 2021.

78. Kashyap A, Mahajan V, Whig J, Gupta S. Bilateral chylothorax, chylopericardium and chylous ascitis. *Lung India* 2011;28:133–135. Available at: [/pmc/articles/PMC3109838/](https://pubmed.ncbi.nlm.nih.gov/3109838/). Accessed May 5, 2021.

79. Sanso LM, Lief L, Rajwani K. Chylous Pleural And Pericardial Effusions In Adenocarcinoma Of The Lung. *Am. J. Respir. Crit. Care Med* 2016. Accessed May 5, 2021.

80. Gupta A, Ikram S, Wijsekera V. Infected Chylous Pericardial Tamponade in a Morbidly Obese Patient. 2017. Available at: <http://dx.doi.org/10.1016/j.hlc.2017.06.625>. Accessed May 5, 2021.

81. Santis A de, Gilberto GM, Mangini S, Megale AB, Gaiotto FA, Terra RM, Garcia RG. A medical epopee: recurrent fungal endocarditis, heart transplantation and chylopericardium. *BMC Cardiovasc Disord* 2020;20:1–6. Available at: <https://doi.org/10.1186/s12872-020-01755-z>. Accessed May 5, 2021.

82. Mi H, Chi J, Zhao X, Lu Q. A case report of generalized lymphangiomatosis with chylopericardium: The crucial role of magnetic resonance lymphangiography. *Eur Hear J - Case Reports* 2020;4:1–5. Available at: <https://academic.oup.com/ehjcr/article/4/5/1/5903173>. Accessed May 5, 2021.

83. Liberman M, Klopfenstein JJ. Chylopericardial tamponade. *Interact Cardiovasc Thorac Surg* 2006;5:249–250. Available at: [www.icvts.org](http://www.icvts.org). Accessed May 5, 2021.

84. Katabi A, Al-Ourani M, Zeid F. A Case of Congenital Lymphedema Complicated by Chronic

- Chylous Effusions and Recurrent Pericardial Effusion Requiring Pericardial Window. *Cureus* 2020;12. Available at: <https://pubmed.ncbi.nlm.nih.gov/32550076/>. Accessed May 5, 2021.
85. Savran S V., Ratshin RA, Shirley JH, Naguwa SM, Goodman L. Idiopathic chylopericardium: 131-I-triolein scan for noninvasive diagnosis. *Ann Intern Med* 1975;82:663–665. Available at: <https://pubmed.ncbi.nlm.nih.gov/124543/>. Accessed May 5, 2021.
86. Vinayakumar D, Arunkumar G, Sajeev CG, Rajesh G, Muneer K, Haridasan V, Babu K, Krishnan MN. Cystic lymphangioma of pericardium presenting as isolated chylopericardium-A case report. *Indian Heart J* 2014;66:119–121. Available at: </pmc/articles/PMC4054826/>. Accessed May 5, 2021.
87. Melduni RM, Oh JK, Bunch TJ, Sinak LJ, Gloviczki P. Reconstruction of occluded thoracic duct for treatment of chylopericardium: A novel surgical therapy. *J Vasc Surg* 2008;48:1600–1602. Available at: <https://pubmed.ncbi.nlm.nih.gov/19118743/>. Accessed May 5, 2021.
88. Matsuyama N, Kishida K, Kodama T, Kondo K, Asada K, Sasaki S. Surgical Treatment of Primary Chylopericardium Through a Left Thoracotomy. *Bull Osaka Med Coll* 2003. Available at: <https://www.osaka-med.ac.jp/deps/b-omc/articles/49/491-3.pdf>. Accessed May 5, 2021.
89. Jenner RE, Oo H. Isolated chylopericardium due to mediastinal lymphangiomatous hamartoma. *Thorax* 1975;30:113–117. Available at: <http://thorax.bmj.com/>. Accessed May 5, 2021.
90. Kawthar AM. Idiopathic chylopericardium A case report from Saudi Arabia. *Saudi Med J* 2020;41:304–308. Available at: <https://pubmed.ncbi.nlm.nih.gov/32114604/>. Accessed May 5, 2021.
91. Mahon NG, Nölke L, McCann H, Sugrue D, Hurley J. Isolated chylopericardium. *Surgeon* 2003;1:236–238. Available at: <https://pubmed.ncbi.nlm.nih.gov/15570769/>. Accessed May 5,

2021.

92. Koksel O, Mavioglu I, Ocal K, Gul A, Yildirim C, Ozdulger A. Traumatic chylopericardium: A case report and review of the literature. *J Trauma - Inj Infect Crit Care* 2007;63. Available at: <https://pubmed.ncbi.nlm.nih.gov/17622859/>. Accessed May 5, 2021.

93. Barillas S, Rodas A, Ardebol J, Martí JL. Nontraumatic chylothorax secondary to lymphoma and filariasis. *J Surg Case Reports* 2020;2020:1–3.

94. Reddy CM, Reddy HVR. Spontaneous chylopericardium in an adult due to mediastinal cystic hygroma. *Indian J Thorac Cardiovasc Surg* 2021;37:591–595.

95. Fady G, Rajdev S, Mohan A, Albakshy F. Recurrent paget-schroetter syndrome complicated by chylous pericardial tamponade and superior vena cava syndrome in a young male patient. *Eur. Heart J.: Cardiovasc. Imaging* 2019;13.
